# Supplementary material for: Functional antagonism between ΔNp63α and GCM1 regulates human trophoblast stemness and differentiation
Source: Nat Commun. 2022 Mar 25;13:1626. doi: 10.1038/s41467-022-29312-6 (PMC8956607; doi:10.1038/s41467-022-29312-6)
Supplement: Supplementary file 1 — Supplementary Information [file 41467_2022_29312_MOESM1_ESM.pdf]

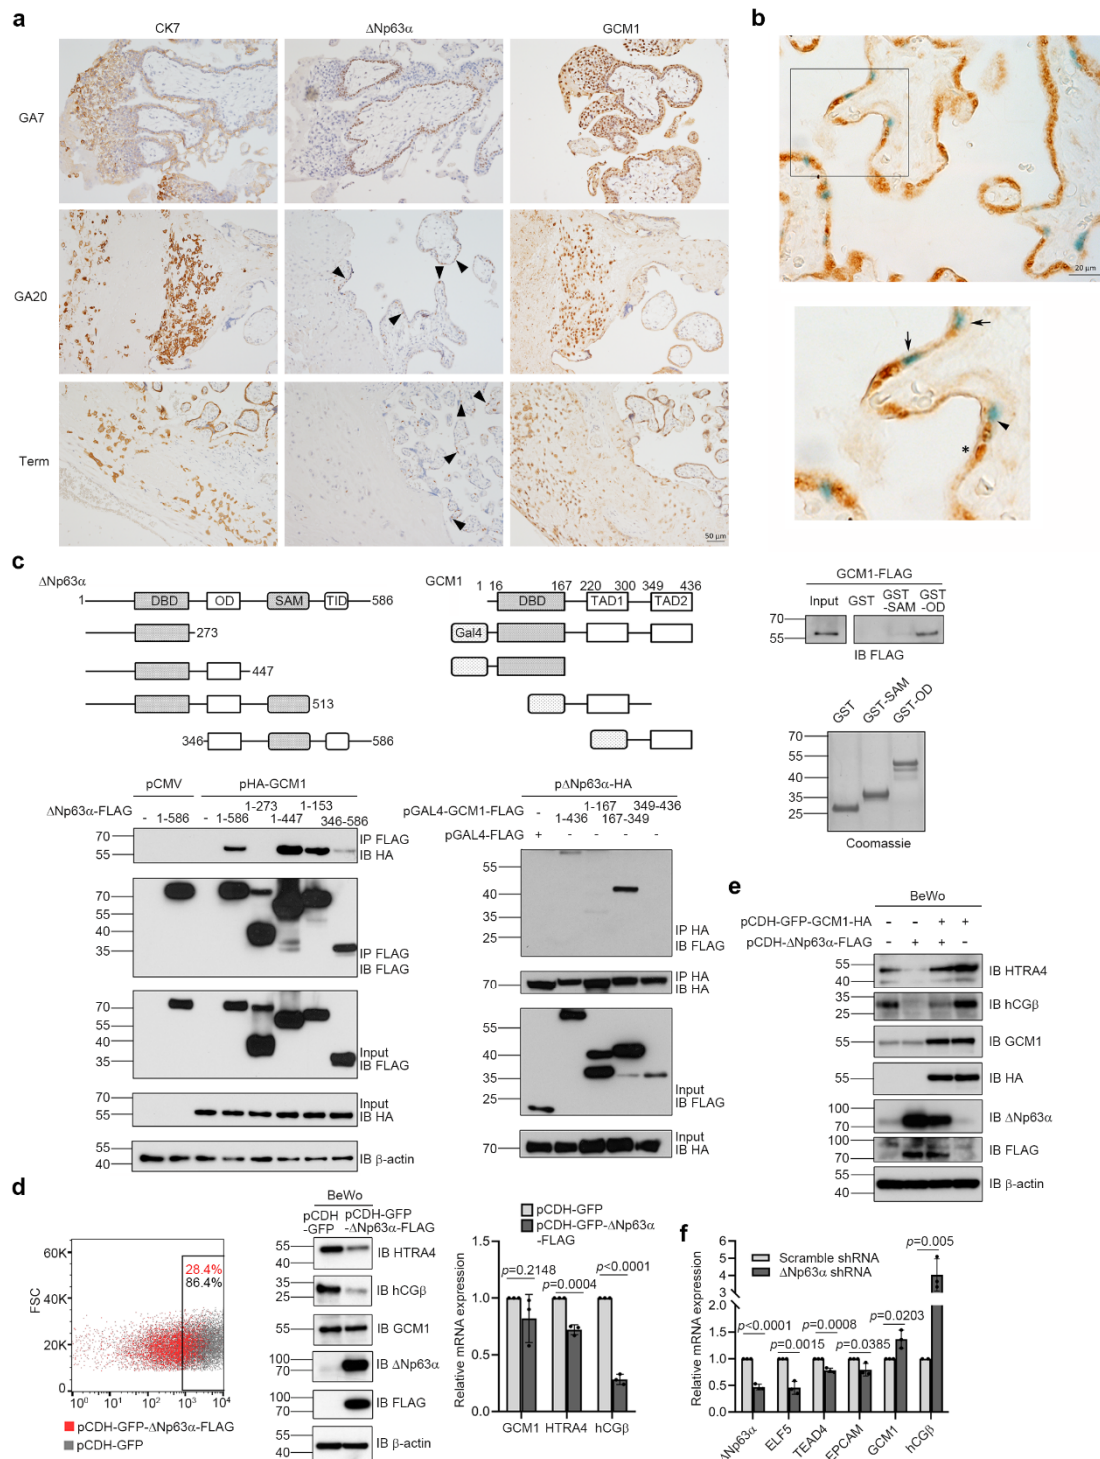

**Supplementary Figure 1.** Expression of  $\Delta$ Np63 $\alpha$  and GCM1 in the human placenta and characterization of the  $\Delta$ Np63 $\alpha$ -GCM1 interaction. **a**, Immunohistochemistry of  $\Delta$ Np63 $\alpha$  and GCM1 in placentas at different gestational ages. Sections of first-trimester (gestational age 7 weeks, GA7), second-trimester (GA20), and term human placentas were immunostained with cytokeratin 7 (CK7),  $\Delta$ Np63 $\alpha$ , and GCM1 Abs, respectively. The sections were further counterstained with hematoxylin to localize the cell nuclei. Arrowhead indicates a  $\Delta$ Np63 $\alpha$ -expressing CTB or nucleus in the STB layer. Scale bar:

50  $\mu$ m. **b**, Co-expression of  $\Delta$ Np63 $\alpha$  and GCM1 in placental trophoblasts. Term human placental sections were subjected to immunostaining using  $\Delta$ Np63 $\alpha$  Ab, AP-conjugated secondary Ab, and StayGreen chromogen (Abcam, Cambridge, UK), and then GCM1 Ab, HRP-conjugated secondary Ab, and DAB chromogen (Vector Labs, Burlingame, CA). A higher magnification image of the boxed region is shown below. Arrowhead, asterisk, and arrow indicate trophoblasts expressing  $\Delta$ Np63 $\alpha$  (green), GCM1 (brown), and both factors, respectively. Scale bar, 20  $\mu$ m. **c**, Mapping of GCM1-interacting domain in  $\Delta$ Np63 $\alpha$  (left) and  $\Delta$ Np63 $\alpha$ -interacting domain in GCM1 (middle). 293T cells were transfected with the indicated expression plasmids, followed by coimmunoprecipitation analyses with FLAG and HA mAbs. DBD, DNA-binding domain; OD, oligomerization domain; SAM, sterile alpha motif; TID, transactivation inhibitory domain; TAD, transactivation domain. Direct interaction between GCM1 and  $\Delta$ Np63 $\alpha$  in pull-down assays (right). Recombinant GCM1-FLAG purified from 293T cells transfected with pGCM1-FLAG was incubated with bacterially expressed GST- $\Delta$ Np63 $\alpha$ -SAM or GST- $\Delta$ Np63 $\alpha$ -OD pre-bound to glutathione-conjugated agarose beads (GE Healthcare Biosciences, Pittsburgh, PA), followed by immunoblotting with FLAG mAb. **d**, Suppression of GCM1 target gene expression by  $\Delta$ Np63 $\alpha$ . BeWo cells were transduced with lentiviruses harboring pCDH-GFP or pCDH-GFP- $\Delta$ Np63 $\alpha$ -FLAG, followed by flow cytometry of GFP-positive cells. Mock or  $\Delta$ Np63 $\alpha$ -FLAG-expressing BeWo cells were subjected to immunoblotting and quantitative RT-PCR analyses of GCM1, hCG $\beta$ , and HTRA4 proteins and transcripts. **e**, GCM1 overexpression counteracts the suppression of GCM1 target genes by  $\Delta$ Np63 $\alpha$ . BeWo cells were transduced with lentiviruses harboring pCDH or pCDH- $\Delta$ Np63 $\alpha$ -FLAG, followed by puromycin selection. Mock or  $\Delta$ Np63 $\alpha$ -FLAG-expressing BeWo cells were further transduced with lentiviruses harboring pCDH-GFP or pCDH-GFP-GCM1-HA and subjected to immunoblotting analysis of GCM1, hCG $\beta$ , and HTRA4 proteins. **f**, Downregulation of TS stemness genes by  $\Delta$ Np63 $\alpha$  knockdown. Scramble control or  $\Delta$ Np63 $\alpha$ -knockdown JEG3 cells were subjected to quantitative RT-PCR analysis of the TS cell marker genes, *ELF5*, *TEAD4*, and *EPCAM*. Note that expression of *GCM1* and *hCG $\beta$*  genes are upregulated in the  $\Delta$ Np63 $\alpha$ -knockdown cells. Data are presented as mean  $\pm$  SD of independent experiments (n=3 in **d**, **f**). Differences were assessed by unpaired two-tailed Student's *t*-test. Source data are provided in the Source Data file.

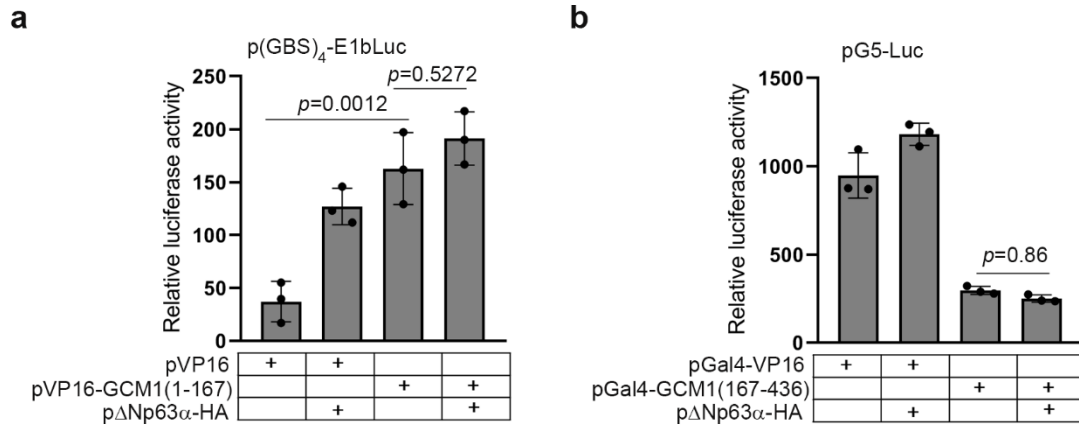

**Supplementary Figure 2.** ΔNp63α does not directly regulate the DNA-binding and transcriptional activities of GCM1. **a**, 293T cells were transfected with the GCM1 reporter plasmid p(GBS)<sub>4</sub>-E1bLuc, the pVP16 plasmid encoding the VP16 TAD, the pVP16-GCM1(1-167) plasmid encoding a fusion protein of GCM1 DBD and VP16 TAD, and pΔNp63α-HA for assessing the effect of ΔNp63α on the DNA-binding activity of GCM1. **b**, 293T cells were transfected with the Gal4 reporter plasmid pG5-Luc, the pGal4-VP16 plasmid encoding a fusion protein of Gal4 DBD and VP16 TAD, the pGal4-GCM1(167-436) encoding a fusion protein of Gal4 DBD and GCM1 TAD, and pΔNp63α-HA for assessing the effect of ΔNp63α on the transcriptional activity of GCM1. Cells were harvested for luciferase assays at 48 h post-transfection. Data are presented as mean ± SD of independent experiments (n=3 in **a**, **b**). Differences were assessed by two-way ANOVA with Tukey's post hoc test. Source data are provided in the Source Data file.

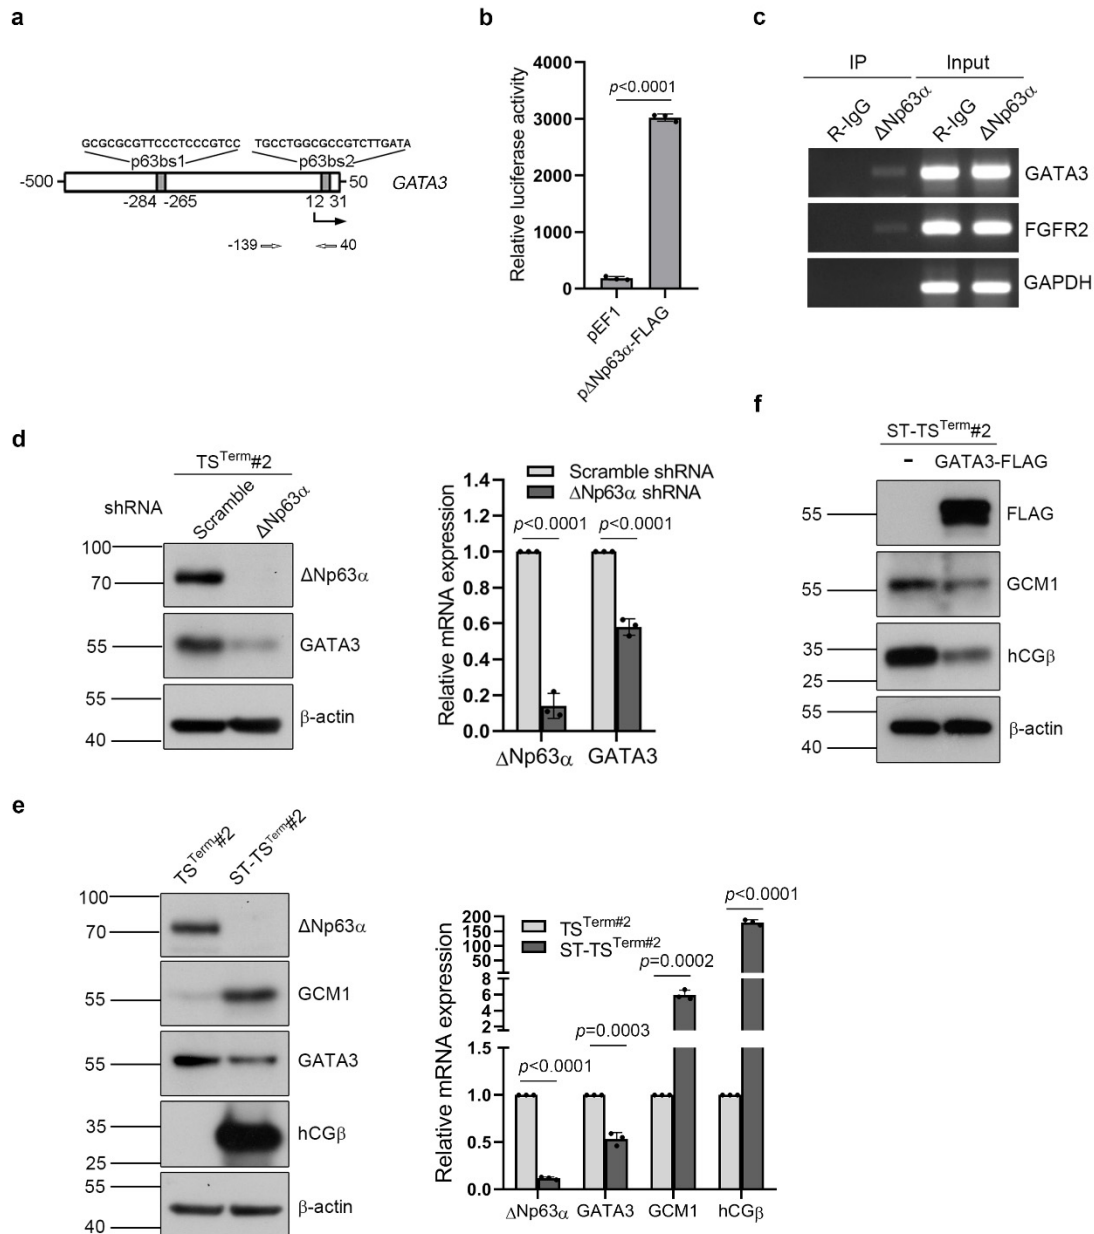

**Supplementary Figure 3.** Regulation of GATA3 promoter activity by  $\Delta$ Np63 $\alpha$  and regulation of STB differentiation by GATA3. **a**, Schematic representation of GATA3 promoter. Two candidate p63-binding sites (p63bs1, and -2) are listed. Arrow indicates the transcriptional start site. Arrows with transparent background indicate the ChIP primer set. **b**,  $\Delta$ Np63 $\alpha$  stimulates GATA3 promoter activity. The luciferase reporter plasmid pGATA3-0.5Kb, which harbors the 0.5 Kb genomic fragment upstream of the transcriptional start site of *GATA3*, was cotransfected with pEF1 or p $\Delta$ Np63 $\alpha$ -FLAG into Hep3B cells. At 48 h post-transfection, cells were harvested for luciferase assays. **c**, Association of  $\Delta$ Np63 $\alpha$  with *GATA3* promoter. TS<sup>Term#2</sup> cells were subjected to ChIP analysis using normal rabbit IgG (R-IgG) or a rabbit anti-p63 $\alpha$  mAb (Cell Signaling). The immunopurified genomic fragments were analyzed by PCR with primer sets

specific for *GATA3* and the known p63 target gene, *FGFR2*<sup>1</sup>. The sequences of the primer sets were listed in Supplementary Table 1. **d**, Regulation of GATA3 expression by  $\Delta$ Np63 $\alpha$  in TS<sup>Term</sup> cells. TS<sup>Term</sup>#2 cells were transduced with lentivirus harboring scramble or  $\Delta$ Np63 $\alpha$  shRNA and cultured for 96 h and then subjected to immunoblotting and quantitative RT-PCR analyses of GATA3 and  $\Delta$ Np63 $\alpha$  proteins and transcripts. **e**, Downregulation of  $\Delta$ Np63 $\alpha$  and GATA3 during STB differentiation. TS<sup>Term</sup>#2 cells were treated with FSK for 72 h for ST-TS<sup>Term</sup>#2 differentiation and then subjected to immunoblotting and quantitative RT-PCR analyses of  $\Delta$ Np63 $\alpha$ , GCM1, GATA3, and hCG $\beta$  proteins and transcripts. **f**, Suppression of STB differentiation by GATA3. TS<sup>Term</sup>#2 cells were transduced with lentivirus harboring GATA3-FLAG and treated with FSK for 48 h for ST-TS<sup>Term</sup>#2 differentiation. Cells were then harvested for immunoblotting analysis of GATA3-FLAG, GCM1, and hCG $\beta$  proteins. Data are presented as mean  $\pm$  SD of independent experiments (n=3 in **b**, **d**, **e**). Differences were assessed by unpaired two-tailed Student's *t*-test. Source data are provided in the Source Data file.

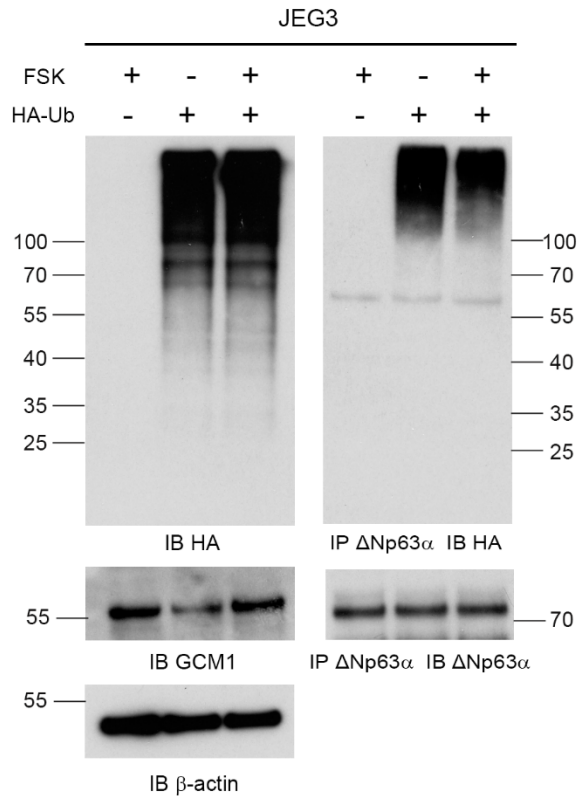

**Supplementary Figure 4.** Neither GCM1 nor FSK affects ΔNp63α ubiquitination. JEG3 cells were transfected with pHA-Ub, which is an expression plasmid encoding HA-tagged ubiquitin. At 24 h post-transfection, cells were treated with 5 μM MG132 plus or minus 50 μM FSK for another 12 h. Cells were then harvested for coimmunoprecipitation analyses with a guinea pig anti-p63α Ab and HA mAb. Note that levels of HA-Ub-conjugated ΔNp63α are not significantly affected by FSK or GCM1. Source data are provided as a Source Data file.

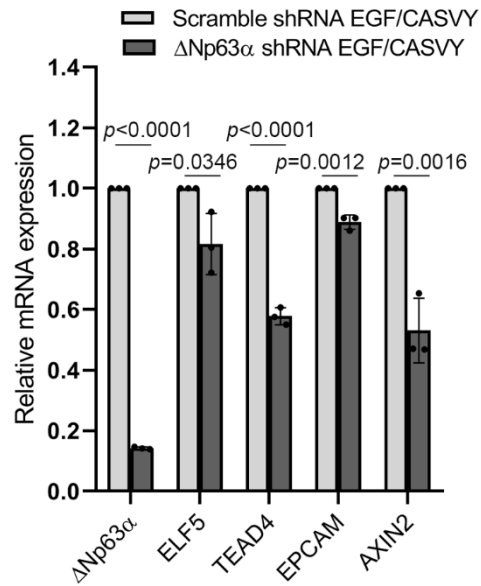

**Supplementary Figure 5.** Effects of  $\Delta Np63\alpha$  knockdown on EGF/CASVY-induced trophoblast stemness gene expression. Scramble control or  $\Delta Np63\alpha$ -knockdown BeWo cells were treated with EGF/CASVY for 24 h for analysis of trophoblast stemness gene expression. Because  $\Delta Np63\alpha$  enhances WNT signaling<sup>2</sup>,  $\Delta Np63\alpha$  knockdown led to decreased *AXIN2* expression. Data are presented as mean  $\pm$  SD of independent experiments (n=3). Differences were assessed by unpaired two-tailed Student's *t*-test. Source data are provided in the Source Data file.

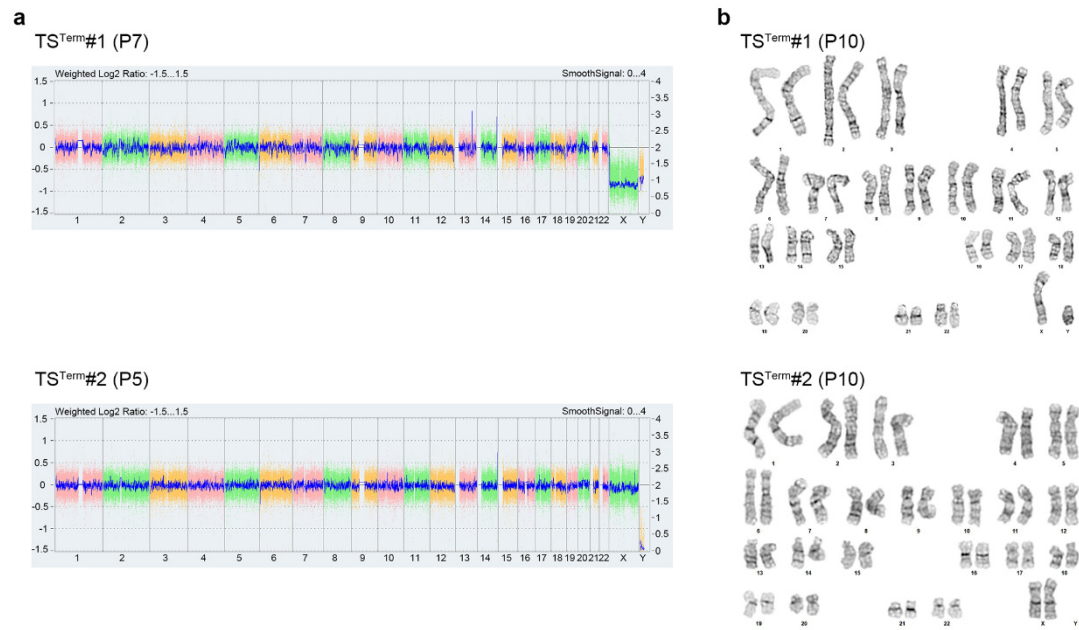

**Supplementary Figure 6.** Chromosomal analysis of TS<sup>Term</sup> cells. **a**, Chromosomal microarray analysis of TS<sup>Term</sup>#1 (P7) and #2 (P5) cells using the Affymetrix CytoScan 750K arrays. Data are expressed as the weighted log<sub>2</sub> ratio of the copy number on the left Y-axis and the chromosome number on the X-axis. **b**, G-banded karyotyping of TS<sup>Term</sup>#1 (P10) and #2 (P10) cells in metaphase.

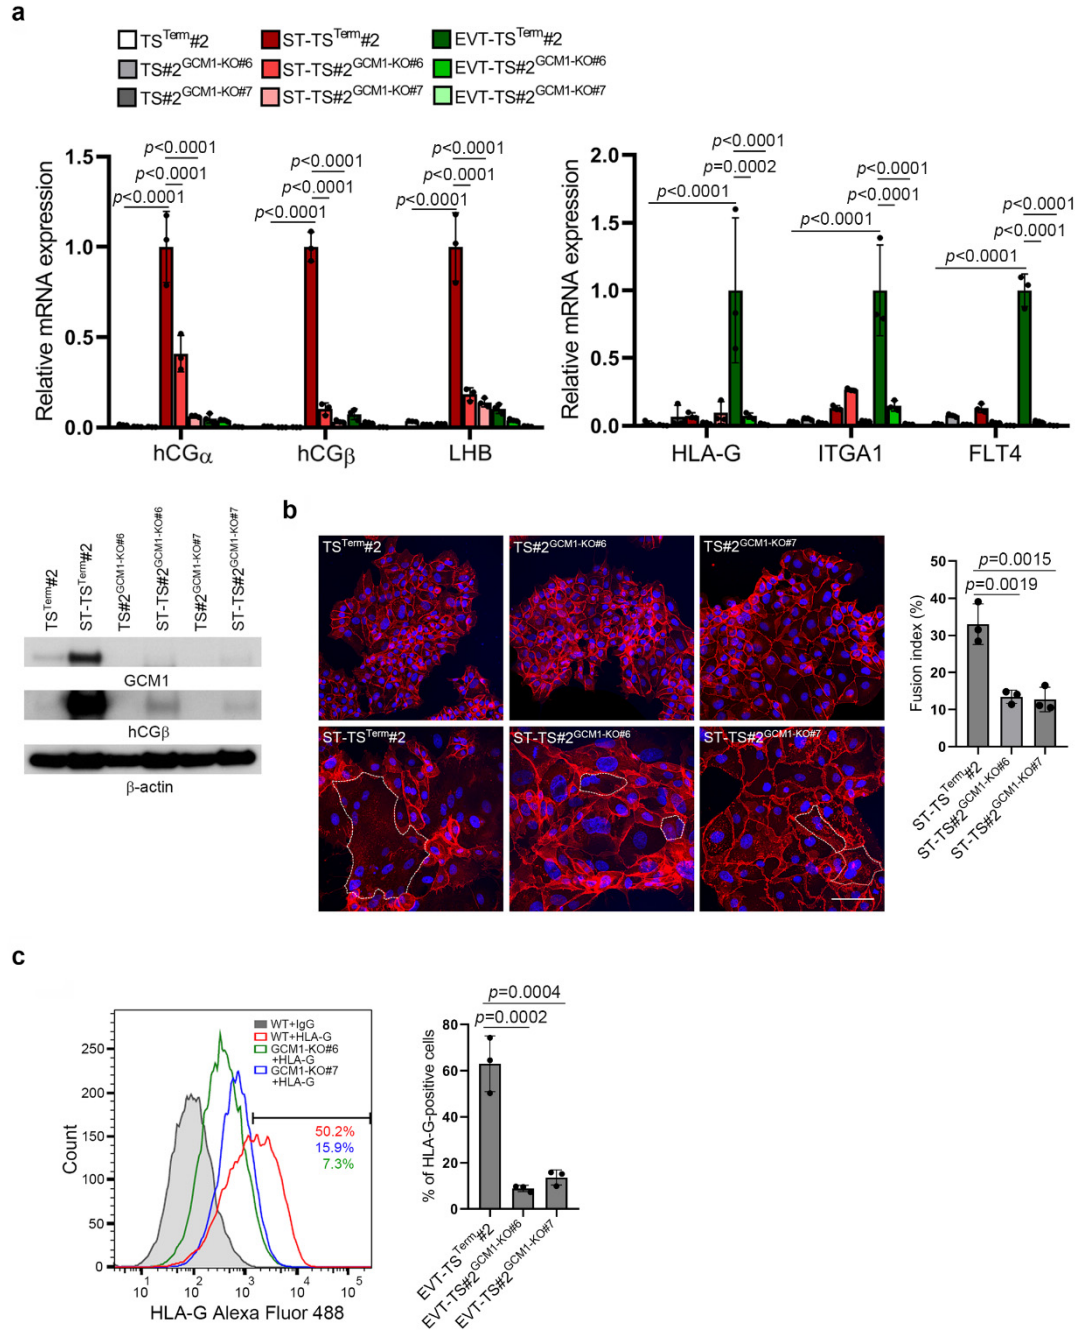

**Supplementary Figure 7.** GCM1 is essential for STB and EVT differentiation from TS<sup>Term</sup> cells. **a**, WT and *GCM1*-KO TS<sup>Term</sup> (TS#2<sup>GCM1-KO#6</sup> and TS#2<sup>GCM1-KO#7</sup>) cells were induced into STBs or EVTs and then harvested for analysis of differentiation genes. Cell fusion (**b**) and surface expression of HLA-G (**c**) are impaired in the *GCM1*-KO TS<sup>Term</sup> cells. Syncytial margins are marked with stippled line. Scale bar, 100  $\mu$ m. Data are presented as mean  $\pm$  SD of independent experiments (n=3 in **a-c**). Differences were assessed by two-way (**a**) or one-way (**b**, **c**) ANOVA with Tukey's post hoc test. Source data are provided in the Source Data file.

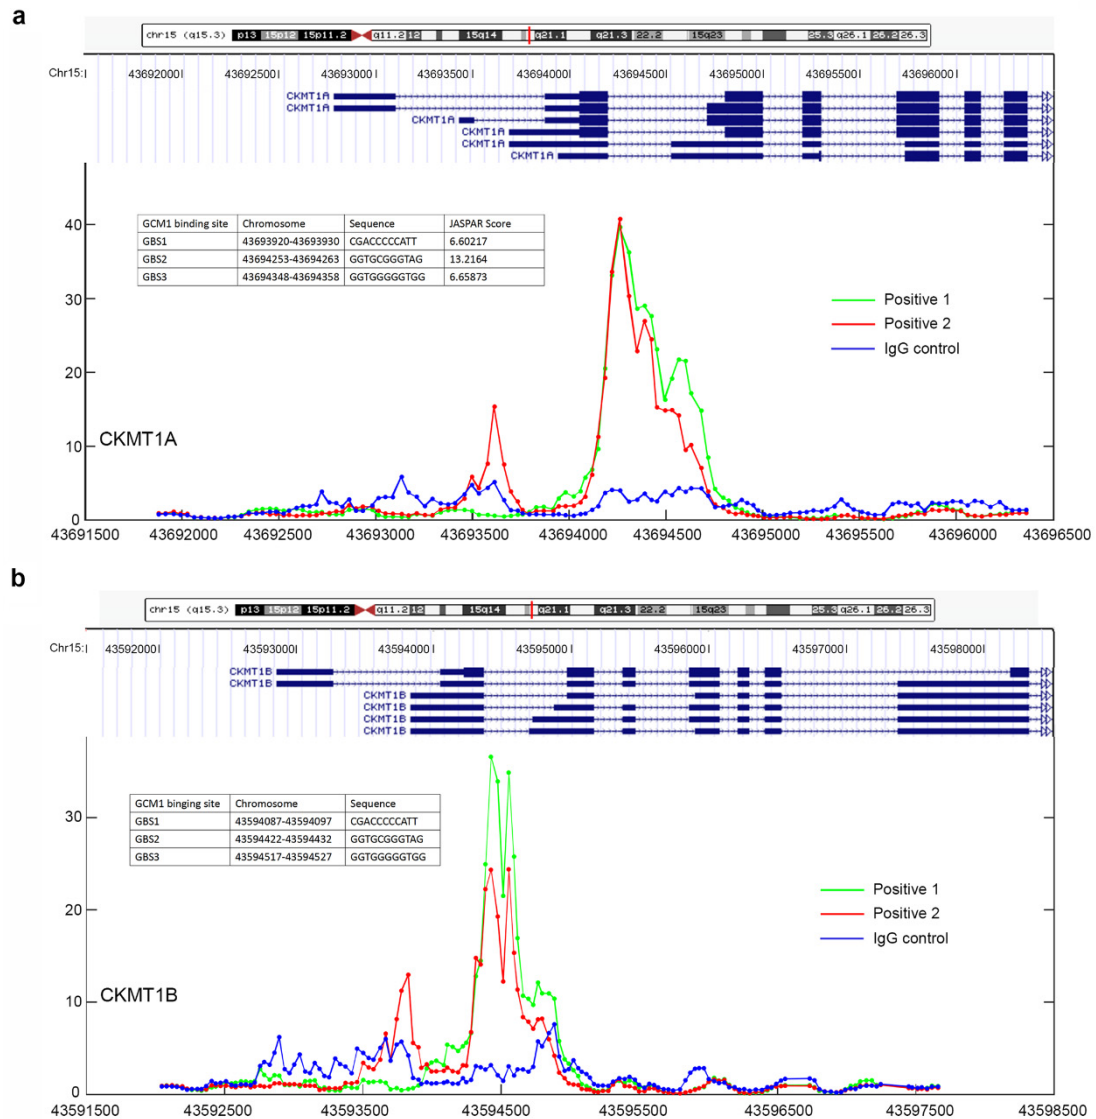

**Supplementary Figure 8.** *CKMT1* is a GCM1 target gene. ChIP-chip experiments in BeWo cells stably expressing HA-GCM1 using HA mAb (positive) or normal mouse IgG (control) revealed association of HA-GCM1 with an intron region immediately downstream of exon 1 in the *CKMT1A* (a) and *-1B* (b) genes on chromosome 15q15.3. Putative GCM1-binding sites (GBSs) and their sequences are listed.

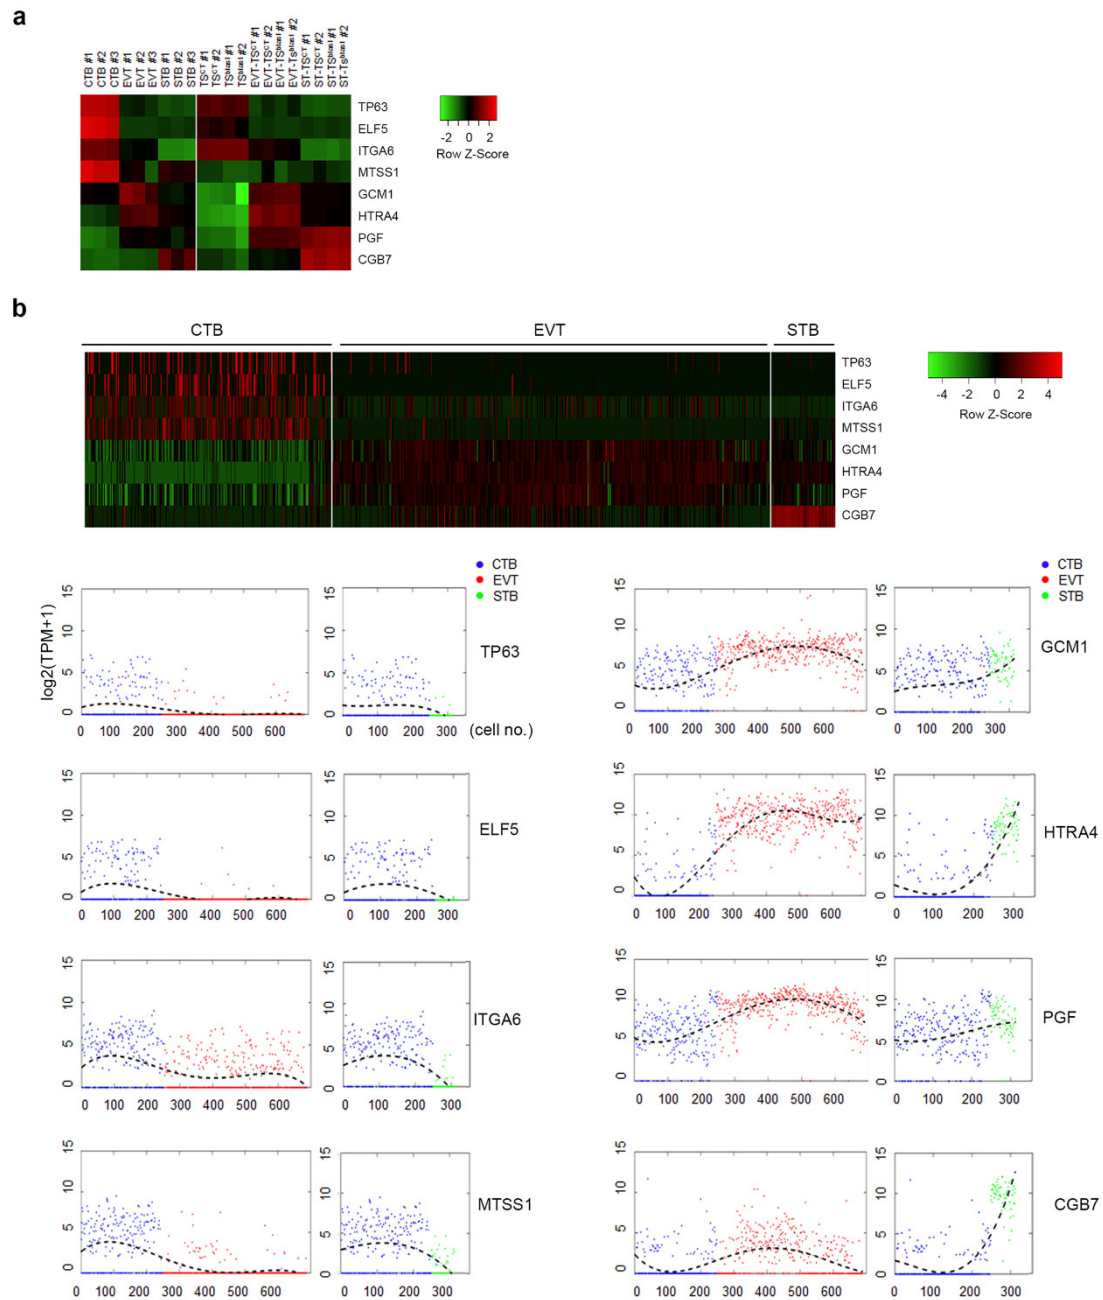

**Supplementary Figure 9.** Reciprocal expression of *GCM1* and  $\Delta Np63\alpha$  genes in  $TS^{CT}$  and  $TS^{blast}$  cells and differentiated trophoblasts. **a**, Meta-analysis of trophoblast differentiation and stemness gene expression in RNA-seq datasets (JGAD000073 and JGAD000115) of  $TS^{CT}$  and  $TS^{blast}$  cells and their derivative STBs (ST-TS cells) and EVTs (EVT-TS cells) and purified first-trimester CTBs, STBs, and EVTs <sup>3</sup>. Heatmap representation of relative expression (Z-score) of *GCM1* and its differentiation-related target genes *HTRA4*, *PGF*, and *CGB7* as well as  $\Delta Np63\alpha$  and trophoblast stemness genes *ELF5* and *ITGA6* is shown. The  $\Delta Np63\alpha$  target gene *MTSS1* serves as a positive control. **b**, Meta-analysis of single-cell RNA-seq data of human first-trimester trophoblasts. Single-cell RNA-seq data were extracted from the GSE89497 dataset <sup>4</sup>.

The cell no. indicates the single-cell serial number code. Heatmap and dot plot showing the expression levels of the selected genes in individual CTBs, EVTs, and STBs are presented.

Antibody: ITGA6 Ab

BD FACSDiva 8.0.1

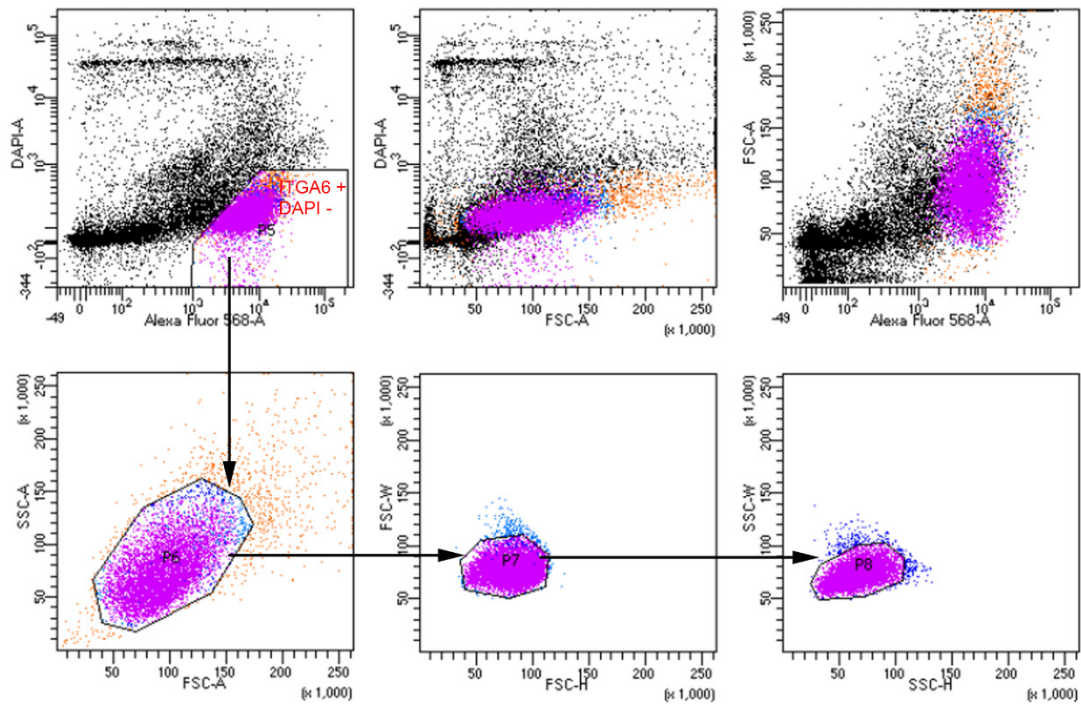

Antibody: Rat IgG

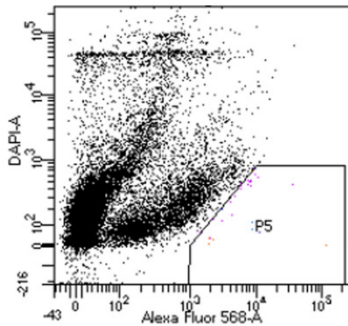

**Supplementary Figure 10.** Purification of ITGA6-positive cytotrophoblasts from term placentas. Primary trophoblasts were incubated with ITGA6 antibody or normal rat IgG (negative control) and then sequentially gated using Alexa Fluor 568-A/DAPI-A, FSC-A/SSC-A, FSC-H/FSC-W, and SSC-H/SSC-W to remove debris and discard doublets. The preserved singlets were considered as ITGA6-positive and alive cytotrophoblasts.

**Supplementary Table 1. List of shRNAs, sgRNAs, and primers**

| Gene                   | shRNA target sequence |                           |
|------------------------|-----------------------|---------------------------|
| Scramble               | CCTAAGGTAAAGTCGCCCTCG |                           |
| GCM1                   | CCTCAGCAGAACTCACTAAAT |                           |
| $\Delta$ Np63 $\alpha$ | AGTTGCACTTATTGACCATT  |                           |
| CKMT1A                 | TGAGGAGACCTATGAGGTATT |                           |
| GATA3                  | CATCCAGACCAGAAACCGAAA |                           |
| Gene                   | sgRNA target sequence |                           |
| GCM1                   | CAGGAAGGCGTCCAATTGCC  |                           |
| Gene (qRT-PCR)         | Orientation           | Primer sequence           |
| $\Delta$ Np63 $\alpha$ | Forward               | AGGAAGAGACAGGAAGGC        |
| $\Delta$ Np63 $\alpha$ | Reverse               | TGTGTGCTGAGGAAGGT         |
| ELF5                   | Forward               | GCTGCGACCAGTACAAGTTG      |
| ELF5                   | Reverse               | CTGCCTCGACGAACTCCTC       |
| EPCAM                  | Forward               | GCCCTCCAGAACAATGATG       |
| EPCAM                  | Reverse               | AGAGCAGGTTATTTCAAGTGTC    |
| TEAD4                  | Forward               | GACAGAGTATGCTCGCTAT       |
| TEAD4                  | Reverse               | CTGGCTGACACCTCAAAG        |
| AXIN2                  | Forward               | GTCTCCAAGCAGCTGAAGCC      |
| AXIN2                  | Reverse               | CCTCCATCACCGACTGGATC      |
| GCM1                   | Forward               | AACTCCATCATGAAGTGTGACG    |
| GCM1                   | Reverse               | GATCCACATCTGCTGGAAGG      |
| HTRA4                  | Forward               | TTCTGTGAGCGAGACCC         |
| HTRA4                  | Reverse               | GGAGATTCCATCAGTCACCC      |
| hCG $\beta$            | Forward               | CTGAGTCTCTGAGGTCACTT      |
| hCG $\beta$            | Reverse               | TGATAGGATGCTGGGGT         |
| Syncytin-1             | Forward               | GAAGGCCCTTCATAACCAATGA    |
| Syncytin-1             | Reverse               | GATATTTGGCTAAGGAGGTGATGTC |
| PGF                    | Forward               | TCAGAGGTGGAAGTGGTACCCT    |
| PGF                    | Reverse               | GCAGAGGCCCGGCATTC         |
| WNT10B                 | Forward               | TTCTGTGAGCGAGACCC         |
| WNT10B                 | Reverse               | CATCACACAGCACATAGC        |
| GATA3                  | Forward               | GACCCACCACCCCATCA         |
| GATA3                  | Reverse               | GGTTCTGTCCGTTCAATTTGT     |
| HLA-G                  | Forward               | CGCACAGACTGACAGAAT        |
| HLA-G                  | Reverse               | AGGTAATCCTTGCCATCGTA      |
| ITGA1                  | Forward               | CCTGTTCTTGATGATTCTCTACC   |

|                    |                    |                              |
|--------------------|--------------------|------------------------------|
| ITGA1              | Reverse            | TTGACTGTGAGGCTAACG           |
| FLT4               | Forward            | ACAACTGGGTGTCCTTTC           |
| FLT4               | Reverse            | TCTGCTCAAACCTCCTCCG          |
| CKMT1              | Forward            | AAAGATAGCCGCTTCCC            |
| CKMT1              | Reverse            | GCCGTTCAACAATCAATCAAATAGTTTA |
| UBC                | Forward            | GCTGGAAGATGGACGCA            |
| UBC                | Reverse            | ATTCTCAATGGTGTCACCTCG        |
| <b>Gene (ChIP)</b> | <b>Orientation</b> | <b>Primer sequence</b>       |
| GATA3              | Forward            | GAGAAAGTCCTGGAGCGG           |
| GATA3              | Reverse            | TTCTGAAAGTATCAAGACGGC        |
| FGFR2              | Forward            | AAATGAGCGCGCAAGTTAGA         |
| FGFR2              | Reverse            | CGAACTGGACCGACTTTTTC         |
| GAPDH              | Forward            | AAAAGCGGGGAGAAAGTAGG         |
| GAPDH              | Reverse            | CTAGCCTCCCGGGTTTCTCT         |

#### Supplementary references

1. McDade SS, *et al.* Genome-wide analysis of p63 binding sites identifies AP-2 factors as co-regulators of epidermal differentiation. *Nucleic Acids Res* **40**, 7190-7206 (2012).
2. Patturajan M, *et al.* DeltaNp63 induces beta-catenin nuclear accumulation and signaling. *Cancer Cell* **1**, 369-379 (2002).
3. Okae H, *et al.* Derivation of Human Trophoblast Stem Cells. *Cell Stem Cell* **22**, 50-63 e56 (2018).
4. Liu Y, *et al.* Single-cell RNA-seq reveals the diversity of trophoblast subtypes and patterns of differentiation in the human placenta. *Cell Res* **28**, 819-832 (2018).
